# Supplementary material
Source: publisher figshare collection journal article supplement (https://acs.figshare.com/ndownloader/files/24459079)
Supplement: Supplementary file 1 [file 24459079]

## Supporting Information

# **Microfluidic Electrochemical Sensor for Cerebrospinal Fluid and Blood Dopamine Detection in a Mouse Model of Parkinson's Disease**

Mehmet Senel <sup>a\*</sup>, Esma Dervisevic <sup>b</sup>, Sammy Alhassen <sup>a</sup>, Muamer Dervisevic <sup>c,d</sup>, Amal  
Alachkar <sup>a\*</sup>, Victor J. Cadarso <sup>b,e</sup>, and Nicolas H. Voelcker <sup>c,d,e</sup>

<sup>a</sup> Department of Pharmaceutical Sciences, University of California, Irvine, CA 92697-4625, United States.

<sup>b</sup> Department of Mechanical and Aerospace Engineering, Monash University, Clayton, VIC 3800, Australia.

<sup>c</sup> Monash Institute of Pharmaceutical Sciences, Monash University, Parkville, VIC 3052, Australia.

<sup>d</sup> Commonwealth Scientific and Industrial Research Organization (CSIRO) Manufacturing, Clayton, VIC 3168, Australia.

<sup>e</sup> Victorian Node of the Australian National Fabrication Facility, Melbourne Centre for Nanofabrication (MCN), Clayton, Victoria 3168, Australia.

\*Corresponding authors;

### **Mehmet Senel**

Department of Pharmaceutical Sciences, University of California, Irvine, CA 92697-4625, United States, E-mail: msenel@uci.edu, msenel81@gmail.com

### **Amal Alachkar**

Department of Pharmaceutical Sciences, University of California, Irvine, CA 92697-4625, United States, E-mail: [aalachka@uci.edu](mailto:aalachka@uci.edu)

## Table of content

|                                                                                                           |    |
|-----------------------------------------------------------------------------------------------------------|----|
| <b>Figure S1.</b> Cyclic voltammogram of microelectrode performed in H <sub>2</sub> SO <sub>4</sub> ..... | S3 |
| <b>Figure S2.</b> Atomic force microscope height image of Au microelectrode.....                          | S3 |
| <b>Figure S3.</b> The repeatability of the microfluidic dopamine-sensing device.....                      | S4 |
| <b>Figure S4.</b> Amperometric response of microfluidic device to the CSF samples.....                    | S5 |

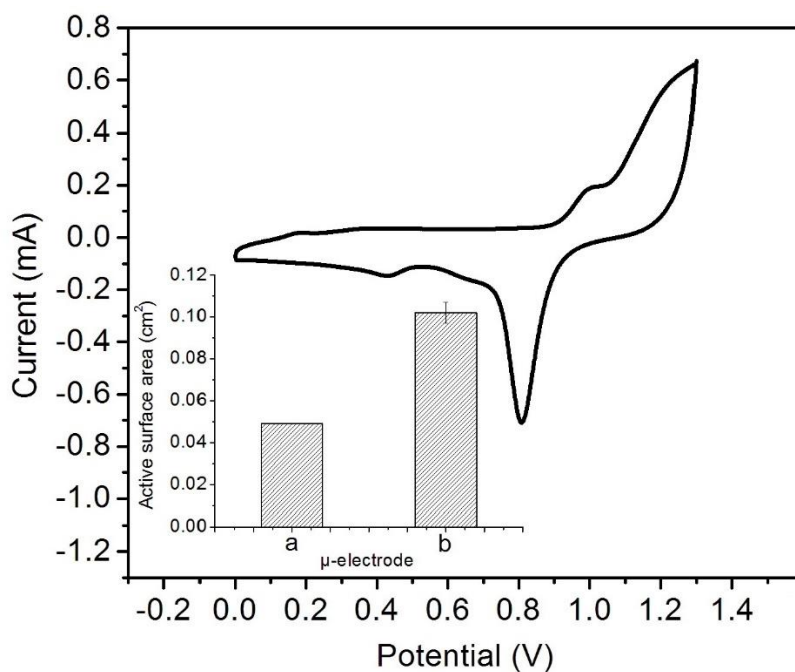

**Figure S1.** Cyclic voltammogram of microelectrode performed in 0.5 M H<sub>2</sub>SO<sub>4</sub> at a scan rate of 100 mVs<sup>-1</sup> (inset of the figure shows histogram of measured surface area and electrochemically determined active surface area of the microelectrode (SD, n=3)).

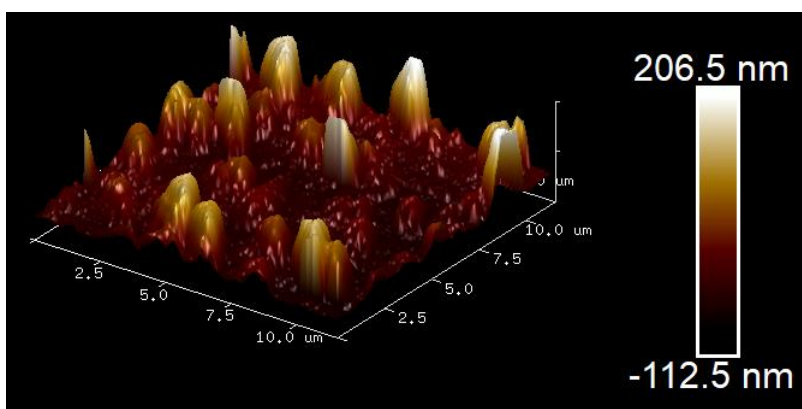

**Figure S2.** Atomic force microscope height image of Au microelectrode.

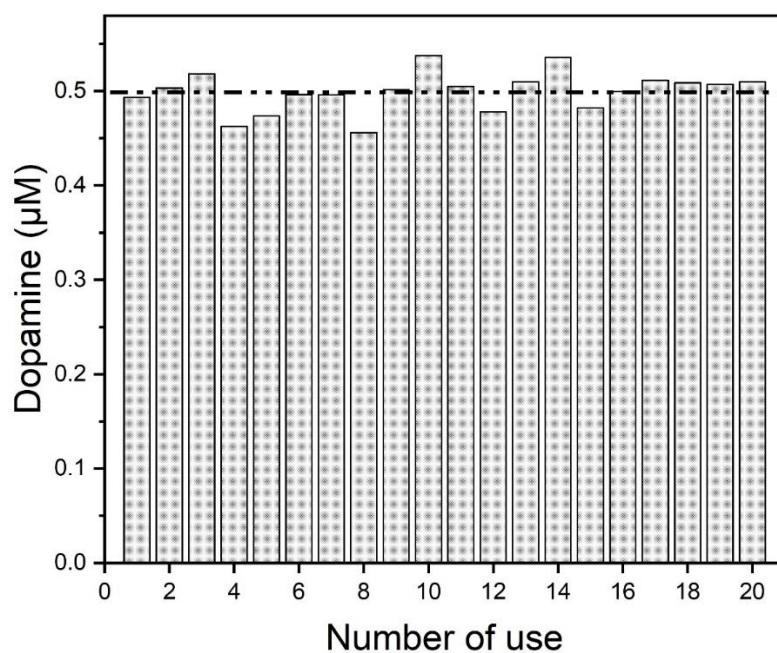

**Figure S3:** Dopamine concentration detected when using a single microfluidic device for 20 times.

The repeatability of the current response of the microfluidic dopamine-sensing device was tested by using one microfluidic device for 20 times with 500 nM dopamine in 0.1 M PBS. The current obtained varied between -3.31 and -2.80  $\mu\text{A}$ , which corresponds to 456 nM and 539 nM DA with an average of 500.0 nM and a standard deviation of 21.5 nM that is 4.3%.

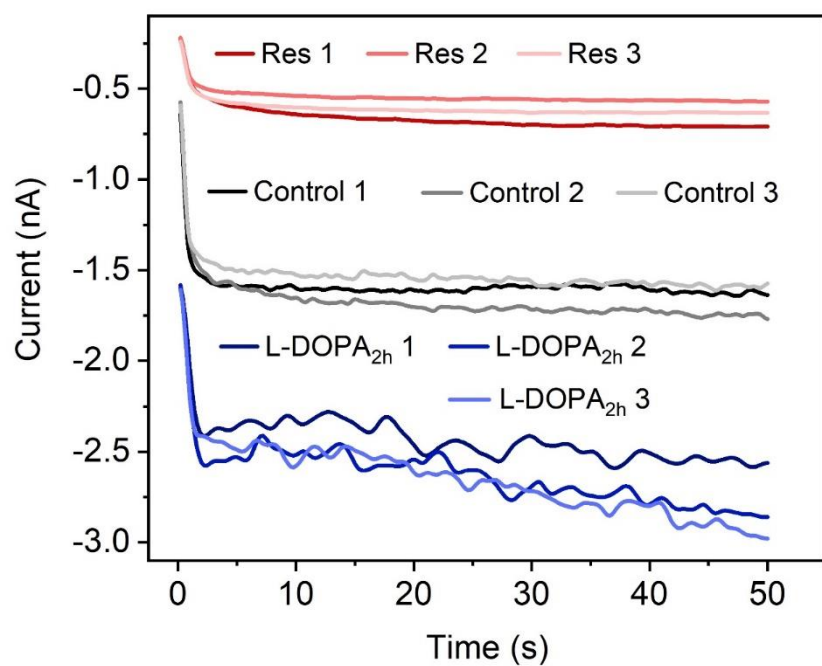

**Figure S4:** Amperometric response of microfluidic device to the CSF samples taken from three study groups each containing control (vehicle-injected), reserpine-induced, and L-DOPA-treated mice.
